# Supplementary material
Source: PubMed Central journal article supplement (PMC5889664)
Supplement: pnas.201721279SI.pdf [file pnas.201721279SI.pdf]

# Supporting Information

Gonzalez et al. 10.1073/pnas.1721279115

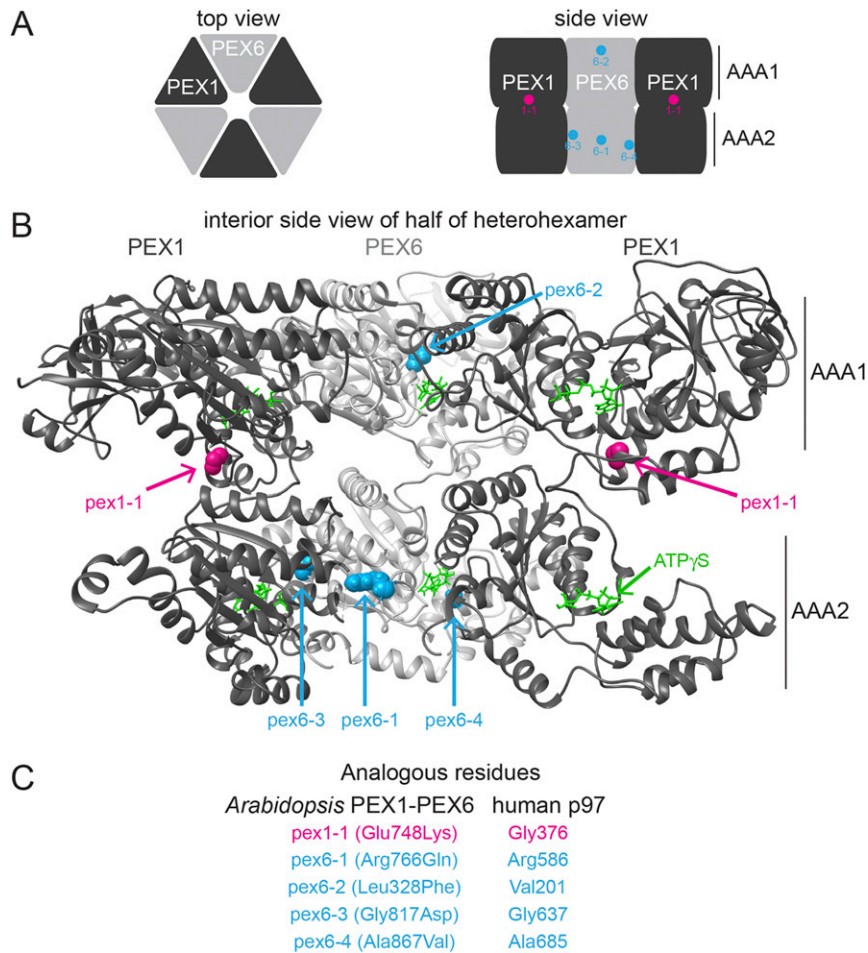

**Fig. S1.** Predicted positions of residues altered in *pex1* and *pex6* proteins based on the crystal structure of the related human ATPase p97. (A) Cartoon depictions of PEX1–PEX6 heterohexamer, viewed from the top to highlight the central pore (Left) and from the side to visualize the stacked AAA1 and AAA2 domains, with dots marking the relative positions of *pex1-1* and *pex6* alterations from B (Right). (B) Side view of three adjacent subunits of the human p97 homohexamer viewed from the interior and colored to illustrate the possible ramifications of *pex1* and *pex6* mutations. The dark gray backbone ribbons represent PEX1 subunits, and the light gray backbone ribbon represents a PEX6 subunit. p97 residues at the positions of *pex1* or *pex6* alterations (C) are shown with side-chain and backbone atoms in spherical representations. Cocrystallized ATP $\gamma$ S is depicted in green. The structure in B was generated from the p97 structure deposited in the Protein Data Bank under ID code 5C18 (62) using University of California, San Francisco, Chimera software (63). (C) Human p97 residues at the positions of *Arabidopsis* *pex1* or *pex6* alterations.

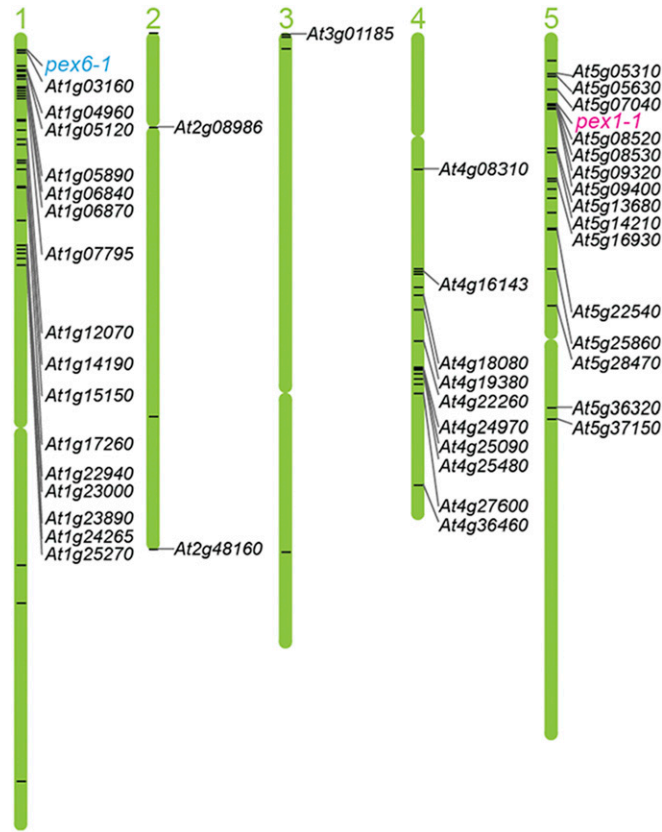

**Fig. S2.** Whole-genome sequencing results of once-backcrossed *pex1-1 pex6-1*. DNA prepared from pooled backcrossed suppressor seedlings was sequenced and inspected for EMS-consistent SNPs (G/C to A/T transitions) in exons, introns, and predicted UTRs that were absent in our laboratory WT strain. Homozygous mutations in exons are highlighted by locus identifiers or the *pex1* or *pex6* allele name to the right of the five *Arabidopsis* chromosomes; homozygous intron and UTR mutations are identified with tick marks lacking gene identifiers. The *Arabidopsis* Information Resource Chromosome Map Tool was used to generate the map.

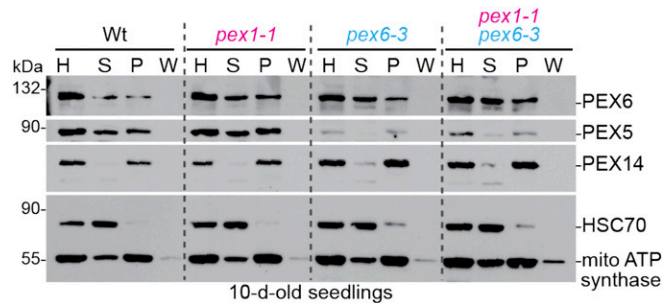

**Fig. S3.** PEX5 remains excessively membrane-associated in *pex1-1 pex6-3*. Homogenates (H) prepared from 10-d-old light-grown WT, *pex1-1*, *pex6-3*, and *pex1-1 pex6-3* seedlings were separated by centrifugation to isolate cytosolic supernatant (S) and an organellar pellet, which was resuspended and re-centrifuged to provide a final organellar pellet (P) and a wash (W) fraction. Fractions were subjected to immunoblotting with the indicated antibodies. HSC70 is cytosolic, and mitochondrial (mito) ATP synthase subunit  $\alpha$  and PEX14 localize in the organelle fraction. The positions of molecular mass markers (in kilodaltons) are indicated on the left.

**Table S1. Summary of mutant phenotypes**

| Genotype                      | Growth without sucrose | IBA response | PEX5 Levels | PTS2 processing (PMDH) | GFP-PTS1 localization | Oil bodies present at 5 d |
|-------------------------------|------------------------|--------------|-------------|------------------------|-----------------------|---------------------------|
| WT                            | Robust                 | Sensitive    | Moderate    | Complete               | Puncta                | Few                       |
| <i>pex1-1</i>                 | Robust                 | Sensitive    | Moderate    | Complete               | Puncta                | Few                       |
| <i>pex6-1</i>                 | Poor                   | Resistant    | Low         | Defect                 | Cytosolic             | Abundant                  |
| <i>pex1-1 pex6-1</i>          | Robust                 | Sensitive    | Low         | Intermediate defect    | Mixed                 | Moderate                  |
| <i>pex6-2</i>                 | Robust                 | Sensitive    | High        | Complete               | Puncta                | Few                       |
| <i>pex1-1 pex6-2</i>          | Robust                 | Sensitive    | High        | Complete               | Puncta                | Few                       |
| <i>pex6-3</i>                 | Robust                 | Resistant    | Low         | Defect                 | Cytosolic             | Moderate                  |
| <i>pex1-1 pex6-3</i>          | Robust                 | Sensitive    | Low         | Intermediate defect    | Mixed                 | Few                       |
| <i>pex6-4</i>                 | Poor                   | Resistant    | Low         | Defect                 | Cytosolic             | Abundant                  |
| <i>pex1-1 pex6-4</i>          | Moderate               | Resistant    | Low         | Defect                 | Mixed                 | Moderate                  |
| <i>pex26-1</i>                | Moderate               | Resistant    | Low         | Intermediate defect    | Mixed                 | Abundant                  |
| <i>pex1-1 pex26-1</i>         | Poor                   | Resistant    | Low         | Defect                 | Mixed                 | Abundant                  |
| WT 35S:PEX5                   | Robust                 | Sensitive    | High        | Complete               | ND                    | ND                        |
| <i>pex1-1</i> 35S:PEX5        | Robust                 | Sensitive    | High        | Complete               | ND                    | ND                        |
| <i>pex6-1</i> 35S:PEX5        | Robust                 | Resistant    | High        | Intermediate defect    | ND                    | ND                        |
| <i>pex1-1 pex6-1</i> 35S:PEX5 | Robust                 | Sensitive    | High        | Intermediate defect    | ND                    | ND                        |
| <i>atg7-3</i>                 | Robust                 | Sensitive    | Moderate    | Complete               | Puncta                | Few                       |
| <i>pex1-1 atg7-3</i>          | Robust                 | Sensitive    | Moderate    | Complete               | ND                    | ND                        |
| <i>pex6-1 atg7-3</i>          | Moderate               | Resistant    | Moderate    | Defect                 | Mixed                 | Few                       |
| <i>pex1-1 pex6-1 atg7-3</i>   | Robust                 | Sensitive    | Low         | Intermediate defect    | Puncta                | Few                       |
| <i>pex13-1</i>                | Robust                 | Sensitive    | Moderate    | Complete               | ND                    | ND                        |
| <i>pex1-1 pex13-1</i>         | Robust                 | Sensitive    | Moderate    | Complete               | ND                    | ND                        |
| <i>pex6-1 pex13-1</i>         | Moderate               | Resistant    | Low         | Defect                 | ND                    | ND                        |
| <i>pex1-1 pex6-1 pex13-1</i>  | Robust                 | Sensitive    | Low         | Intermediate defect    | ND                    | ND                        |

ND, not determined. Gray fill indicates phenotypes similar to WT, blue indicates phenotypes similar to *pex6-1*, lavender indicates intermediate phenotypes, purple indicates phenotypes different from WT or *pex6-1*.

**Table S2. PCR-based genotyping markers used to track mutations and transgenes**

| Mutation or transgene | PCR primers (5' to 3')                                                                   | Restriction enzyme | Product size, bp |          |
|-----------------------|------------------------------------------------------------------------------------------|--------------------|------------------|----------|
|                       |                                                                                          |                    | WT               | Mutant   |
| <i>atg7-3</i>         | LB1-SAIL (GCCTTTTCAGAAATGGATAAATAGCCTTGCTTCC)<br>ATG7-24 (GTCGATTTAAACTTAAAGTTAATGAGATG) | —                  | —                | ~350     |
| <i>ATG7</i>           | ATG7-23 (AGACGGTAACCACTGCTTTCTC)<br>ATG7-24 (GTCGATTTAAACTTAAAGTTAATGAGATG)              | —                  | 539              | —        |
| <i>pex1-1</i>         | PEX1-F5 (CTTGCATTTCGTTGCTTCTGTCCAG)<br>PEX1-F6 (GCATCATATCCTTCACATTAGC)                  | TaqI               | 300              | 197, 103 |
| <i>pex6-1</i>         | F1003-7 (CAGACTTTACTGGCAAAAGCTGTGGCG)<br>F1003-T (GCTTGCACCTATAATAAACAGATCCTGGG)         | XhoI               | 270, 115         | 385      |
| <i>pex6-2</i>         | PEX6-19 (AGGAACCTTTGATCTATACACCAGT)<br>PEX6-AvalI (AGTGAATCACTCCCAACCCGCTGGTC)           | Avall              | 62, 29           | 91       |
| <i>pex6-3</i>         | PEX6-3F1 (AACAGACCTGACTTGATTGAT)<br>PEX6-3R2 (GTCAAAAACAAGAATCAGGAAG)                    | BstNI              | 134, 38          | 172      |
| <i>pex6-4</i>         | PEX6-4F (TTACAGGGAAAGGTTAGG)<br>PEX6-4R (GCCTGAAACCAAGCATC)                              | HhaI               | 180, 40          | 220      |
| <i>pex13-1</i>        | PEX13-1 (AGAATTCATAAATCGAGACCCTAAAAAT)<br>LB1-SALK (CAAACCAGCGTGGACCGCTTGCTGCAACTC)      | —                  | —                | 300      |
| <i>PEX13</i>          | PEX13-1 (AGAATTCATAAATCGAGACCCTAAAAAT)<br>PEX13-2 (TATAGGGGCTGATACATAATAACCTAAAA)        | —                  | 285              | —        |
| <i>pex26-1</i>        | PEX26-1 DdeF1 (GATGCTACACTAACTGTCTATCTCA)<br>PEX26-9 (CATCATCTTTTTCATTACCAACGACTTCTT)    | DdeI               | 131, 23          | 154      |
| <i>pxa1-1</i>         | T5J17-24 (ATGGGAGTCACTTTCATAACCTCATCTCAA)<br>T5J17-25 (CCATCAATCAGCCTTAGCTCCAAGGAATGG)   | SmlI               | 142, 30          | 172      |
| <i>35S:HA-PEX1</i>    | PEX1-F1 (CATTCGTTGCTTCTGTCCA)<br>PEX1-E2 (GCCCCACGTTCCGAGGTAG)                           | —                  | 206              | 206, 112 |
| <i>35S:HA-PEX6</i>    | PEX6-3F1 (AACAGACCTGACTTGATTGAT)<br>PEX6-3R1 (GAGGGACACTTCTTTGCTAC)                      | —                  | 252              | 252, 176 |
| <i>35S:PEX5</i>       | PEX5-38 (TGAAGACCAACAGATAAGG)<br>PEX5-39 (CCCATTGGAGGCATAGG)                             | —                  | 264              | 264, 168 |
| <i>GFP-PTS1</i>       | 35S-F (GGATGACGCACAATCCCACTATCCTTCG)<br>GFP-1 (TTGAAAAGCATTGAAACCCATAAGAGAAAGT)          | —                  | —                | 321      |
